# Supplementary material
Source: publisher figshare collection journal article supplement (https://acs.figshare.com/ndownloader/files/13852847)

Supporting Information

for

**Correlation between Glyoxal-Induced DNA Cross-Links and Hemoglobin**

**Modifications in Human Blood Measured by Mass Spectrometry**

Hauh-Jyun Candy Chen,\* Chun-Ting Liu, and Yi-Jou Li

Department of Chemistry and Biochemistry, National Chung Cheng University, 168

University Road, Ming-Hsiung, Chia-Yi 62142, Taiwan.

## Table legend

**Table S1.** Characteristics of the study participants

**Table S2.** Multiple regression analysis of the extent of modification in the study subjects for variables of HbA1c, age, cigarettes smoked per day (cig/day), and BMI.

## Figure legend

**Figure S1.** nanoLC-NSI/MS/MS chromatograms of SRM transitions of the modified peptides in blank injection.

**Figure S2.** Dose-dependent formation of the glyoxal-modified peptides in human hemoglobin (Sigma Chemical Co.) incubated with glyoxal at 37 °C for 48 h.

**Figure S3.** Dose-dependent formation of (A) TNV<sup>11</sup>KAAWGK ( $\alpha$ -chain) and (B) SAVTALWG<sup>17</sup>KVNVDEVGGEALGR ( $\beta$ -chain) in the incubation mixture of the parent peptide with glyoxal at 37 °C for 1 h.

**Figure S4.** nanoLC-NSI/MS/MS chromatograms of (A) TNV<sup>11</sup>KAAWGK ( $\alpha$ -chain) and (B) SAVTALWG<sup>17</sup>KVNVDEVGGEALGR ( $\beta$ -chain) in the incubation mixture of the parent peptide with glyoxal (0.1  $\mu$ M) at 37 °C for 1 h. The extracted mass spectrum of the respective modified peptide is shown below.

Table S1. Characteristics of the study participants

|                          | DM patients                       | Normal controls                  |
|--------------------------|-----------------------------------|----------------------------------|
|                          | mean $\pm$ SD (range)             |                                  |
| age (years)              | 57.2 $\pm$ 12.7<br>(39 – 77)      | 31.0 $\pm$ 12.9<br>(22 – 60)     |
| Gender                   |                                   |                                  |
| Male                     | 15                                | 14                               |
| Female                   | 9                                 | 5                                |
| BMI (kg/m <sup>2</sup> ) | 27.3 $\pm$ 4.2<br>(18.6 – 34.6)   | 24.5 $\pm$ 2.9<br>(18.7 – 29.3)  |
| HbA1c                    | 9.5% $\pm$ 2.1%<br>(7.0% – 15.1%) | 5.1% $\pm$ 0.2%<br>(5.0% – 5.6%) |
| smoking status           |                                   |                                  |
| cigarettes/day           | 40 $\pm$ 30 (n=6)                 | 25 $\pm$ 1 (n=5)                 |

Table S2. Multiple regression analysis of the extent of modification in the study subjects for variables of HbA1c, age, cigarettes smoked per day (cig/day), and BMI.

| Multiple Regression Analysis (n = 43)                                                                                                                                                                  | HbA1c <sup>b</sup> | age    | cig/day |
|--------------------------------------------------------------------------------------------------------------------------------------------------------------------------------------------------------|--------------------|--------|---------|
|                                                                                                                                                                                                        | <i>p value</i>     |        |         |
| $[\alpha\text{-}^{11}\text{K}^{\text{gx}}] = 1.573\text{E-}05 + 3.246\text{E-}06*[\text{HbA1c}] - 2.397\text{E-}07*[\text{BMI}] - 3.836\text{E-}08*[\text{age}] + 3.242\text{E-}07*[\text{cig/day}]$   | 0.0090             |        |         |
| $[\alpha\text{-}^{92}\text{R}^{\text{gx}}] = - 3.981\text{E-}06 + 3.585\text{E-}07*[\text{HbA1c}] + 1.232\text{E-}07*[\text{BMI}] + 3.717\text{E-}08*[\text{age}] + 4.423\text{E-}08*[\text{cig/day}]$ | 0.0219             |        | 0.0372  |
| $[\beta\text{-}^{17}\text{K}^{\text{gx}}] = 8.866\text{E-}06 - 2.213\text{E-}07*[\text{HbA1c}] - 2.411\text{E-}07*[\text{BMI}] + 4.419\text{E-}07*[\text{age}] - 9.082\text{E-}10*[\text{cig/day}]$    |                    | 0.0004 |         |

\*Only the statistically significant results are listed.

Figure S1.

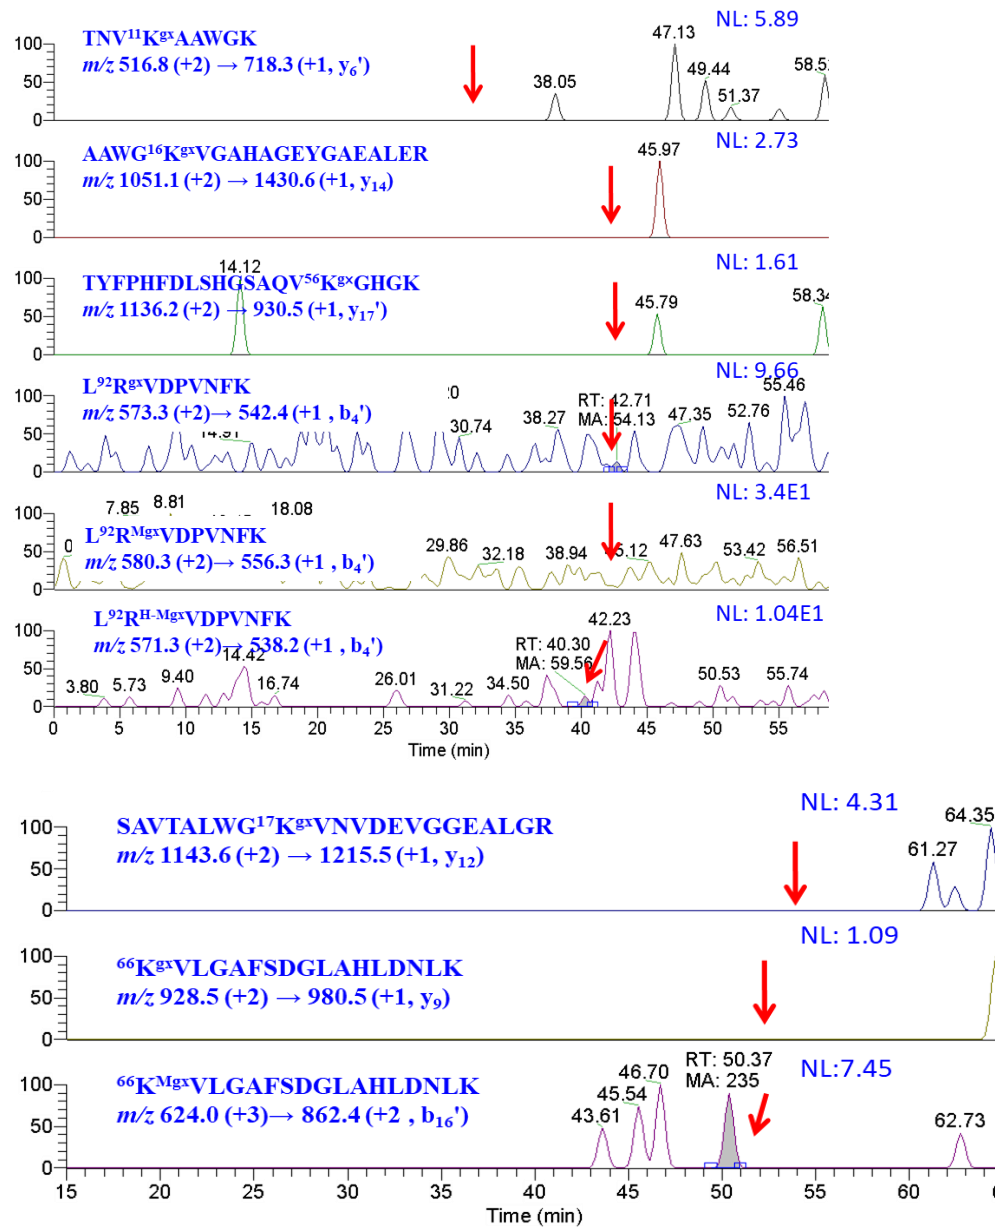

Figure S2.

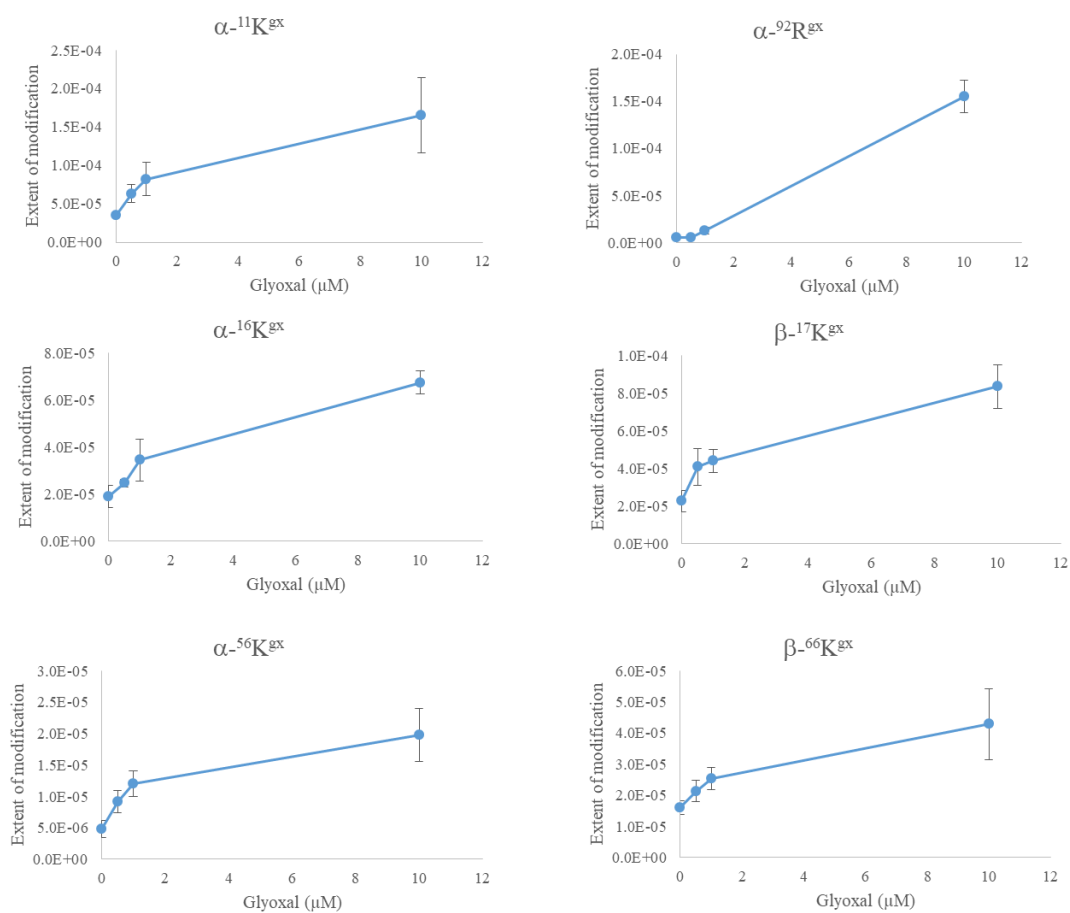

Figure S3.

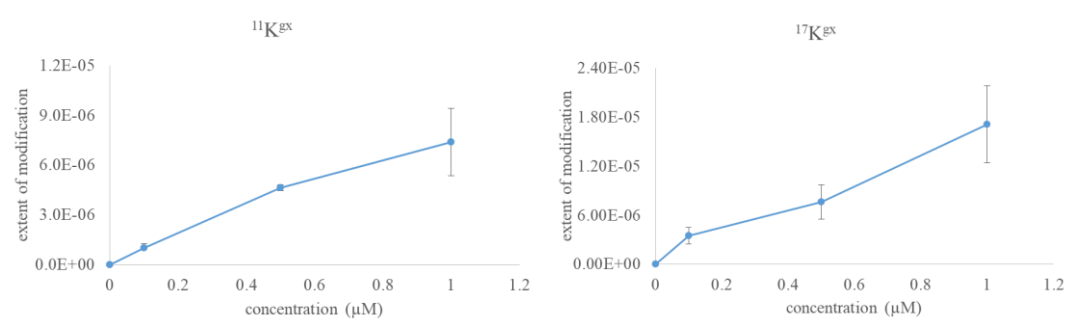

Figure S4.

(A)

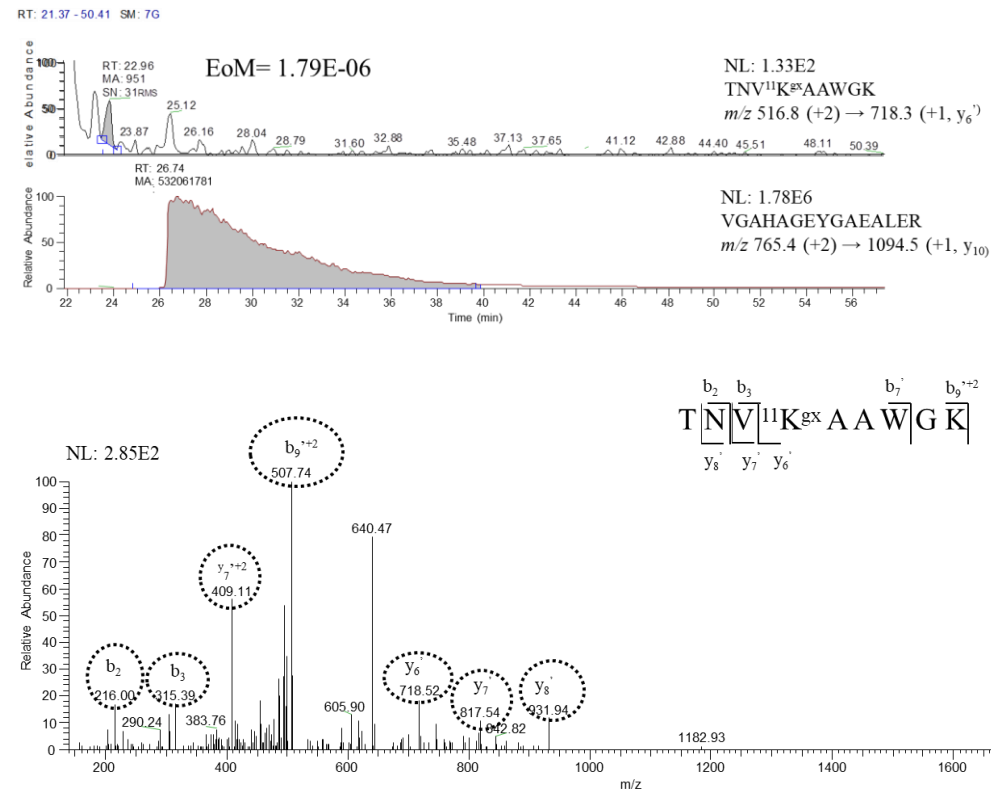

(B)

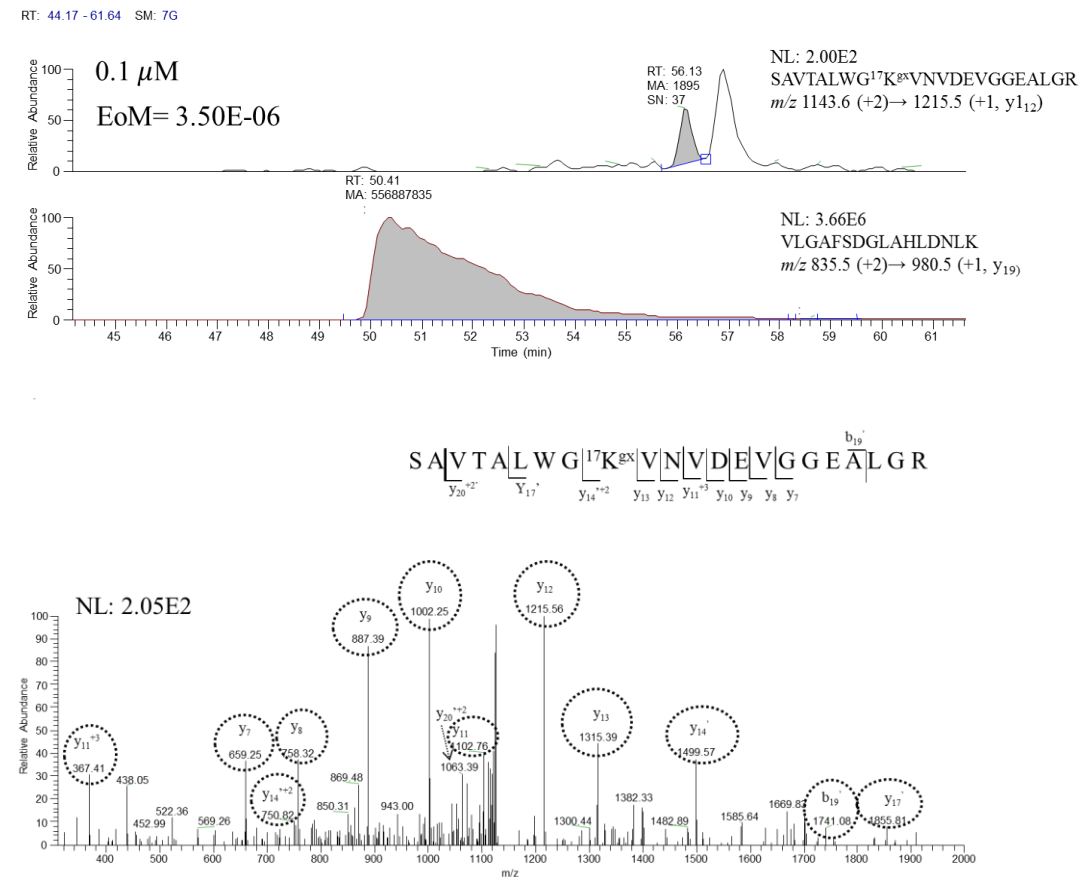

Supplement: Supplementary file 1 [file 13852847]
